# Supplementary material for: Phenolic Composition Stability and Antioxidant Activity of Sour Cherry Liqueurs
Source: MDPI journal article supplement (doi:10.3390/molecules23092156), 2018-08-27
Supplement: s1 [file s1]

Table S3. Validation – intra-day and inter-day precision

| Compound               |       | Concentration<br>µg/ml | Intraday         |            |                 | Interday         |            |                 |
|------------------------|-------|------------------------|------------------|------------|-----------------|------------------|------------|-----------------|
|                        |       |                        | mean±SD<br>µg/ml | RSD<br>(%) | Accuracy<br>(%) | mean±SD<br>µg/ml | RSD<br>(%) | Accuracy<br>(%) |
| Chlorogenic acid       | day 1 | 20                     | 21.79±0.52       | 3.41       | 108.94          | 21.19±0.62       | 2.94       | 105.94          |
|                        | day 2 | 20                     | 20.54±0.05       | 0.36       | 102.72          |                  |            |                 |
|                        | day 3 | 20                     | 21.23±0.37       | 2.53       | 106.15          |                  |            |                 |
|                        | day 1 | 100                    | 98.02±0.95       | 1.38       | 98.02           | 99.42±1.29       | 1.29       | 99.42           |
|                        | day 2 | 100                    | 99.68±0.88       | 1.27       | 99.68           |                  |            |                 |
|                        | day 3 | 100                    | 100.56±1.90      | 2.70       | 100.56          |                  |            |                 |
|                        | day 1 | 300                    | 306.69±1.95      | 0.91       | 102.23          | 302.45±          | 1.30       | 99.19           |
|                        | day 2 | 300                    | 301.76±1.78      | 0.85       | 100.59          |                  |            |                 |
|                        | day 3 | 300                    | 298.90±1.80      | 0.86       | 99.63           |                  |            |                 |
| Quercetin 3-rutinoside | day 1 | 20                     | 19.89±0.25       | 2.53       | 99.46           | 19.72±0.15       | 0.76       | 98.60           |
|                        | day 2 | 20                     | 19.61±0.18       | 1.86       | 98.07           |                  |            |                 |
|                        | day 3 | 20                     | 19.65±0.06       | 0.57       | 98.27           |                  |            |                 |
|                        | day 1 | 100                    | 100.27±0.76      | 1.51       | 100.27          | 100.47±0.73      | 0.73       | 100.47          |
|                        | day 2 | 100                    | 101.28±1.17      | 2.29       | 101.28          |                  |            |                 |
|                        | day 3 | 100                    | 99.86±0.78       | 1.54       | 99.86           |                  |            |                 |
|                        | day 1 | 300                    | 299.86±2.33      | 2.33       | 99.95           | 298.61±1.09      | 0.37       | 99.54           |
|                        | day 2 | 300                    | 298.08±0.99      | 0.66       | 99.36           |                  |            |                 |
|                        | day 3 | 300                    | 297.88±0.71      | 0.47       | 99.29           |                  |            |                 |
| Cyanidin 3-glucoside   | day 1 | 10                     | 9.6±0.35         | 3.14       | 96.05           | 9.70±0.24        | 2.45       | 103.12          |
|                        | day 2 | 10                     | 9.52±0.49        | 4.44       | 95.20           |                  |            |                 |
|                        | day 3 | 10                     | 9.97±0.45        | 3.82       | 99.68           |                  |            |                 |
|                        | day 1 | 50                     | 48.15±2.26       | 4.01       | 96.31           | 49.05±0.80       | 1.63       | 98.10           |
|                        | day 2 | 50                     | 49.31±1.77       | 3.06       | 98.61           |                  |            |                 |
|                        | day 3 | 50                     | 49.69±2.40       | 4.13       | 99.38           |                  |            |                 |
|                        | day 1 | 75                     | 75.56±2.12       | 2.40       | 100.75          | 74.37±1.09       | 1.47       | 99.15           |
|                        | day 2 | 75                     | 73.4±2.83        | 3.29       | 97.90           |                  |            |                 |
|                        | day 3 | 75                     | 74.11±1.70       | 1.96       | 98.81           |                  |            |                 |
| (+) Catechin           | day 1 | 20                     | 20.68±0.35       | 7.14       | 103.42          | 20.29±0.38       | 1.86       | 98.55           |
|                        | day 2 | 20                     | 19.932±1.16      | 3.26       | 99.66           |                  |            |                 |
|                        | day 3 | 20                     | 20.27±0.11       | 2.33       | 101.33          |                  |            |                 |
|                        | day 1 | 100                    | 101.96±0.99      | 4.06       | 101.96          | 100.50±2.01      | 2.00       | 100.50          |
|                        | day 2 | 100                    | 101.33±1.06      | 4.37       | 101.33          |                  |            |                 |
|                        | day 3 | 100                    | 98.20±0.85       | 3.61       | 98.20           |                  |            |                 |
|                        | day 1 | 200                    | 204.54±1.34      | 2.74       | 102.27          | 201.205±2.96     | 1.47       | 100.60          |
|                        | day 2 | 200                    | 198.90±1.70      | 3.57       | 99.45           |                  |            |                 |
|                        | day 3 | 200                    | 200.15±1.41      | 2.95       | 100.08          |                  |            |                 |

RSD-relative standard deviation
