# Supplementary material for: Phenolic Composition Stability and Antioxidant Activity of Sour Cherry Liqueurs
Source: MDPI journal article supplement (doi:10.3390/molecules23092156), 2018-08-27
Supplement: s1 [file s1]

**Table S21. Chromatographic data for phenolic compounds of cherry liqueurs**

| Peak N°               | Compound                           | RT [min] | $\lambda$ max [nm] | Spectrum                                                                             |
|-----------------------|------------------------------------|----------|--------------------|--------------------------------------------------------------------------------------|
| <b>Phenolic acids</b> |                                    |          |                    |                                                                                      |
| 1                     | Neochlorogenic acid                | 2.78     | 245. 325           | 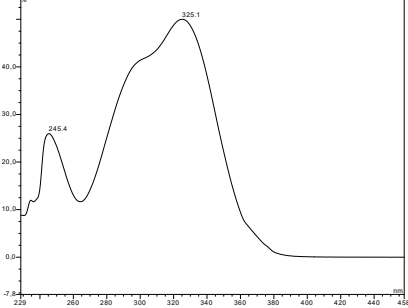   |
| 2                     | Coumaroilquinic acid               | 2.88     | 311                |    |
| 3                     | Chlorogenic acid                   | 5.27     | 245.326            |   |
| <b>Anthocyanins</b>   |                                    |          |                    |                                                                                      |
| 4                     | Cyanidin 3 O- sophoroside          | 5.89     | 281.516            |  |
| 5                     | Cyanidin 3- O- glucosyl rutinoside | 6.38     | 281.517            |  |

|                     |                                          |      |          |                                                                                      |
|---------------------|------------------------------------------|------|----------|--------------------------------------------------------------------------------------|
| 6                   | Cyanidin 3- O- glucoside                 | 6.82 | 281. 515 | 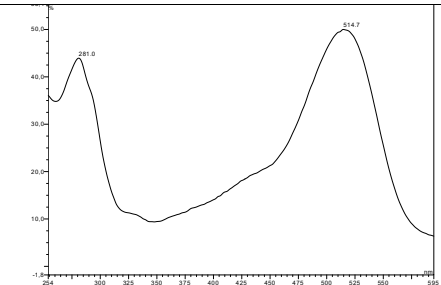   |
| 7                   | Cyanidin 3- O- sambubioside-5-rhamnoside | 7.08 | 280.0519 |    |
| 8                   | Cyanidin 3- O- rutinoside                | 7.47 |          |   |
| <b>Flavan 3-ols</b> |                                          |      |          |                                                                                      |
| 9                   | Procyanidin B1                           | 3.17 | 243.278  |  |
| 10                  | Procyanidin B2                           | 5.43 | 243.282  |  |

|           |                           |      |         |                                                                                      |
|-----------|---------------------------|------|---------|--------------------------------------------------------------------------------------|
| 11        | (-)-Epicatechin +dimer    | 7.46 | 243.281 | 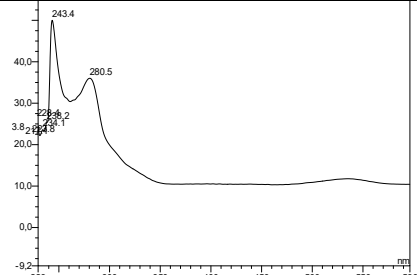   |
| 12        | Procyanidin C1+tetramer   | 8.37 | 243.280 |    |
| Flavonols |                           |      |         |                                                                                      |
| 13        | Kaempferol- trihexoside 1 | 5.51 | 339     |   |
| 14        | Kaempferol- trihexoside 2 | 5.94 | 255.342 |  |
| 15        | Kaempferol- dihexoside    | 8.76 | 253.344 |  |

|    |                                 |       |         |                                                                                                                                                                                                                                                                                                       |
|----|---------------------------------|-------|---------|-------------------------------------------------------------------------------------------------------------------------------------------------------------------------------------------------------------------------------------------------------------------------------------------------------|
| 16 | Quercetin-rutinoside-rhamnoside | 9.40  | 256.354 | 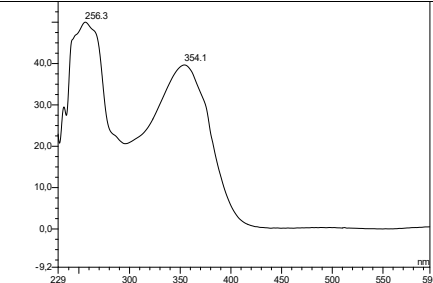 <p>UV-Vis spectrum of Quercetin-rutinoside-rhamnoside. The x-axis represents wavelength in nm (229 to 596), and the y-axis represents absorbance (-9.2 to 40.0). Two peaks are labeled: 256.3 nm and 354.1 nm.</p> |
| 17 | Quercetin-rutinoside            | 12.00 | 258.350 |  <p>UV-Vis spectrum of Quercetin-rutinoside. The x-axis represents wavelength in nm (243 to 486), and the y-axis represents absorbance (10.1 to 226.4). Two peaks are labeled: 257.8 nm and 350.3 nm.</p>           |
| 18 | Quercetin -glucoside            | 12.12 | 257.350 |  <p>UV-Vis spectrum of Quercetin -glucoside. The x-axis represents wavelength in nm (237 to 458), and the y-axis represents absorbance (1.7 to 50.0). Two peaks are labeled: 255.4 nm and 355.0 nm.</p>            |
| 19 | Kaempferol - rutinoside         | 14.17 | 266.346 |  <p>UV-Vis spectrum of Kaempferol - rutinoside. The x-axis represents wavelength in nm (248 to 430), and the y-axis represents absorbance (4.0 to 50.0). Two peaks are labeled: 266.4 nm and 345.9 nm.</p>        |
| 20 | Isorhamnetine- rutinoside       | 14.8  | 255.355 |  <p>UV-Vis spectrum of Isorhamnetine- rutinoside. The x-axis represents wavelength in nm (228 to 455), and the y-axis represents absorbance (-3.4 to 40.0). Two peaks are labeled: 255.4 nm and 355.0 nm.</p>     |
| 21 | Quercetin                       | 20.20 | 257.373 |  <p>UV-Vis spectrum of Quercetin. The x-axis represents wavelength in nm (249 to 469), and the y-axis represents absorbance (13.4 to 40.0). Two peaks are labeled: 257.1 nm and 372.6 nm.</p>                     |

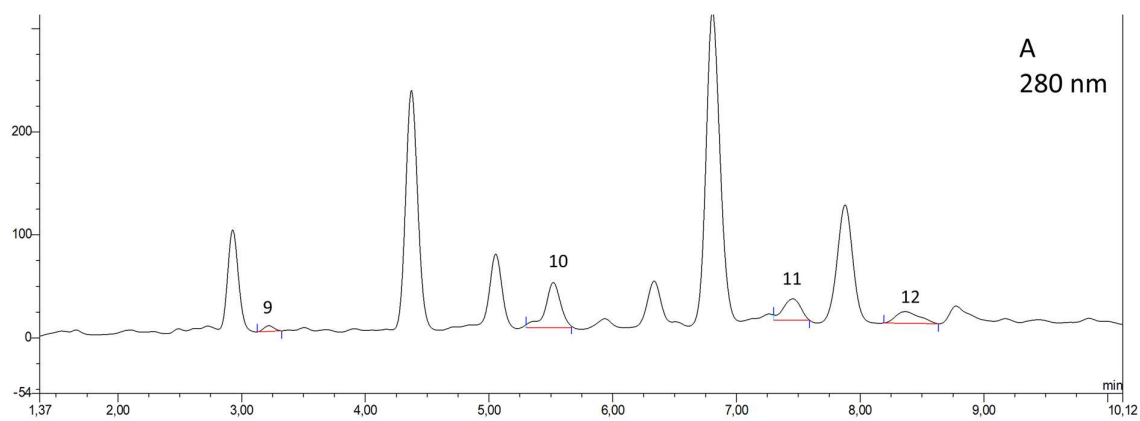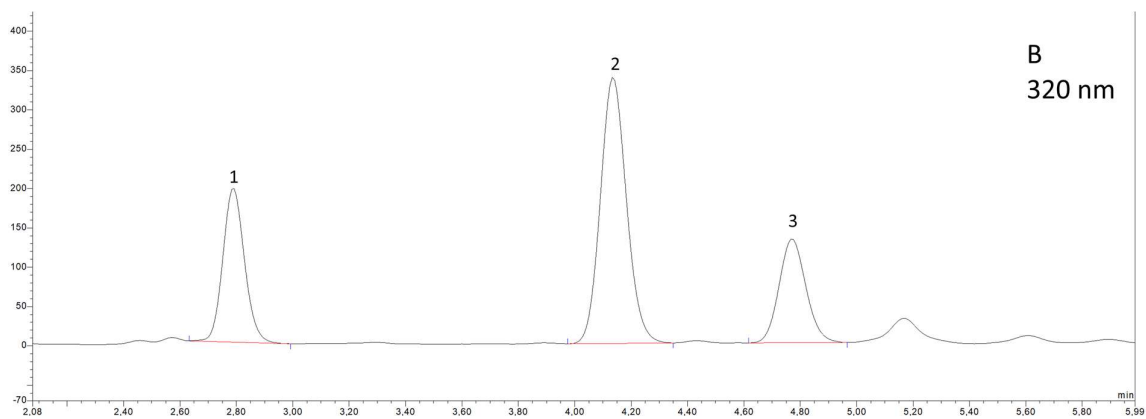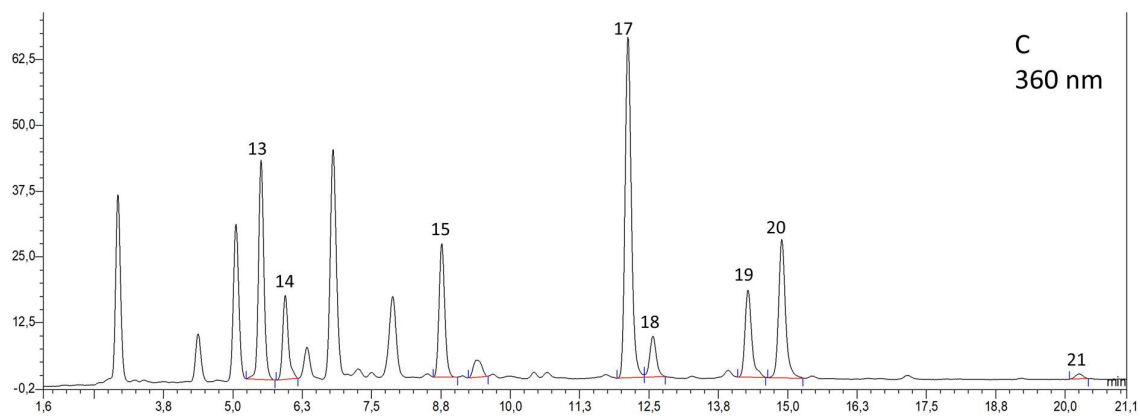

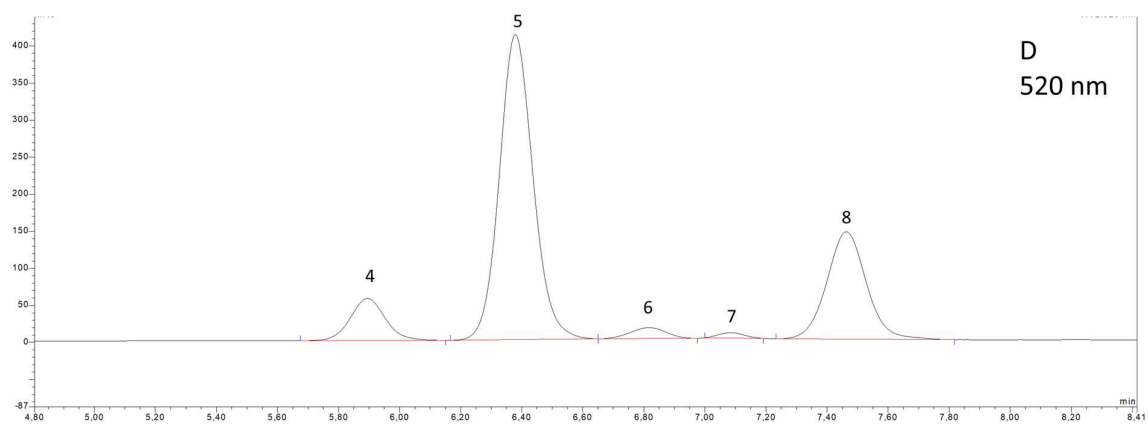

**Figure 1. HPLC chromatograms of phenolic compounds (A- flavan 3-ols; B-phenolic acids; C-flavonols and D-anthocyanins)**
