# Supplementary material for: Phenolic Composition Stability and Antioxidant Activity of Sour Cherry Liqueurs
Source: MDPI journal article supplement (doi:10.3390/molecules23092156), 2018-08-27
Supplement: s1 [file s1]

**Table S 1. LC-MS identification of phenolic compounds in sour cherry liqueurs**

| Peak no | Tentative assingment                  | t <sub>R</sub><br>(min) | MS<br>[M-H] <sup>+</sup><br>[m/z] | MS/MS<br>fragment jons<br>[m/z]      | 0  | Week |      |     |     | Reference                                                                                                   |
|---------|---------------------------------------|-------------------------|-----------------------------------|--------------------------------------|----|------|------|-----|-----|-------------------------------------------------------------------------------------------------------------|
|         |                                       |                         |                                   |                                      |    | 24   |      |     |     |                                                                                                             |
|         |                                       |                         |                                   |                                      |    | 15ns | 30ns | 15s | 30s |                                                                                                             |
| 1       | Protocatehuic acid hexoside           | 1.91                    | 315.0717                          | 153.0195/ 109.0292                   | x  | x    | x    | n   | n   | (Seeram, Bourquin, & Nair, 2001)                                                                            |
| 2       | Neochlorogenic acid                   | 2.45                    | 353.0879                          | 191.0553/179.0349/135.0443           | x  | x    | x    | x   | x   | (Bonerz, Würth, Dietrich, & Will, 2007; Cao, Jiang, Lin, Li, Sun, & Chen, 2015)                             |
| 3       | Dicaffeoylquinic acid 1               | 2.57                    | 515.1381                          | 353.0879/191.0553/179.0349/135.0443/ | tr | x    | x    | tr  | n   | Putatively characterized                                                                                    |
| 4       | Dicaffeoylquinic acid 2               | 2.69                    | 515.14                            | 179.0343/191.0562                    | x  | tr   | tr   | n   | n   | Putatively characterized                                                                                    |
| 5       | Caffeic acid hexoside 1               | 2.71                    | 341.0887                          | 179.0349                             | x  | tr   | x    | n   | n   | Putatively characterized                                                                                    |
| 6       | Kaempferol -3- hexoside               | 2.91                    | 771.204                           | 609.1342/                            | x  | tr   | x    | x   | x   | Putatively characterized                                                                                    |
| 7       | Flavan-3-ol dimer<br>(procyanidin B2) | 2.94                    | 577.1349                          | 289.0723                             | x  | x    | x    | x   | x   | (Bonerz, Würth, Dietrich, & Will, 2007)                                                                     |
| 8       | Flavan-3-ol monomer<br>(+)-catechin)  | 3.25                    | 289.0709                          |                                      |    |      |      |     | x   | (Bonerz, Würth, Dietrich, & Will, 2007; Cao, Jiang, Lin, Li, Sun, & Chen, 2015)                             |
| 9       | p-Coumaroylquinic acid 1              | 3.41                    | 337.0899                          | 675.1927/163.0406/119.0510           | x  | x    | x    | x   | x   | (Cao, Jiang, Lin, Li, Sun, & Chen, 2015; Picariello, De Vito, Ferranti, Paolucci, & Volpe, 2016)            |
| 10      | Caffeic acid hexoside 2               | 3.62                    | 341.0887                          | 179.0349/135.0440                    | x  | x    | x    | x   | x   | Putatively characterized                                                                                    |
| 11      | Flavan-3-ol dimer                     | 3.65                    | 577.1349                          | 289.0723                             | x  | x    | n    | x   | n   | Putatively characterized                                                                                    |
| 12      | Chlorogenic acid                      | 3.77                    | 353.0879                          | 707.1852/191.0553                    | x  | x    | x    | x   | x   | (Bonerz, Würth, Dietrich, & Will, 2007; Cao, Jiang, Lin, Li, Sun, & Chen, 2015)                             |
| 13      | Flavan-3-ol trimer                    | 3.95                    | 865.1841                          | 577.1272/289.0352                    | x  | x    |      | x   | x   | Putatively characterized                                                                                    |
| 14      | Flavan-3-ol monomer( (-) epicatechin) | 3.98                    | 289.0352                          |                                      |    |      | x    |     |     | (Nowicka & Wojdyło, 2016)                                                                                   |
| 15      | benzoic acid dihexoside               | 4.03                    | 445.1333                          | 323.0978/121.0288                    | x  | x    | x    | x   | x   | (Seeram, Bourquin, & Nair, 2001; Toydemir, Capanoglu, Gomez Roldan, de Vos, Boyacioglu, Hall, et al., 2013) |
| 16      | Flavan-3-ol trimer                    | 4.07                    | 865.1984                          | 577.1349/289.0723/125.0241           | x  | x    | x    | n   | n   | Putatively characterized                                                                                    |
| 17      | Flavan-3-ol dimer                     | 4.18                    | 577.1351                          | 407.0778/ 289.0735                   | tr | x    | x    | x   | x   | Putatively characterized                                                                                    |
| 18      | Kaempferol derivative                 | 4.27                    | 773.2153                          | 285.0394/125.0241/637.2014/163.0400  | x  | x    | x    | x   | x   | Putatively characterized                                                                                    |
| 19      | apigenin or genistein hexoside        | 4.34                    | 431.1547                          | 269.1006/161.0449                    | x  | x    | x    | x   | x   | Putatively characterized                                                                                    |
| 20      | Kaempferol dihexsosite derivative     | 4.43                    | 627.1564                          | 491.1386/285.0394/                   | x  | x    | x    | n   | n   | Putatively characterized                                                                                    |
| 21      | Vanilin                               | 4.5                     | 153.0189                          | 109.029                              | n  | x    | x    | n   | n   | Putatively characterized                                                                                    |
| 22      | Kaempferol dihexoside                 | 4.55                    | 611.1603                          | 465.1037/491.1386/323.1346/285.0394  | x  | x    | x    | x   | n   | Putatively characterized                                                                                    |
| 23      | Cyanidin 3-sophoroside                | 4.6                     | 609.1432<br>(+) 611.1612          | 285.0394<br>(+) 287.0554             | x  | x    | x    | x   | n   | (Cao, Jiang, Lin, Li, Sun, & Chen, 2015)                                                                    |
| 24      | Amygdalin                             | 4.65                    | 456.1516                          | 502.1583/323.0978/369.1028           | x  | x    | x    | x   | x   | (Toydemir, et al., 2013)                                                                                    |
| 25      | p-Coumaroylquinic acid 2              | 4.77                    | 337.0924                          | 163.0406/119.0510                    | tr | x    | x    | x   | x   | (Bonerz, Würth, Dietrich, & Will, 2007; Picariello, De Vito, Ferranti, Paolucci, & Volpe, 2016)             |

|    |                                                     |       |                          |                                      |   |   |    |   |    |                                                                                 |
|----|-----------------------------------------------------|-------|--------------------------|--------------------------------------|---|---|----|---|----|---------------------------------------------------------------------------------|
| 26 | Cyanidin 3-(2 <sup>G</sup> glucosyl rutinoside)     | 4.86  | 755.2062<br>(+) 757.2199 | 285.0394/284.0313<br>(+) 287.0551    | x | x | x  | x | x  | (Cao, Jiang, Lin, Li, Sun, & Chen, 2015)                                        |
| 27 | Flavan-3-ol monomer                                 | 4.96  | 289.0723                 | 289.0723                             | x | x | x  | x | x  | Putatively characterized                                                        |
| 28 | Cyanidin 3-glucoside                                | 5.05  | 447.0916<br>(+) 449.1083 | 285.0394/284.0313<br>(+) 287.0554    | x | x | tr | x | tr | (Cao, Jiang, Lin, Li, Sun, & Chen, 2015)                                        |
| 29 | Coumaroylquinic acid                                | 5.27  | 337.0924                 | 163.0406/119.0510                    |   | n | x  | n | x  | Putatively characterized                                                        |
| 30 | Cyanidin 3-rutinoside                               | 5.34  | 593.1507<br>(+) 595.1667 | 285.0395<br>(+) 287.0555             | x | x | tr | x | x  | (Cao, Jiang, Lin, Li, Sun, & Chen, 2015)                                        |
| 31 | genistein or <b>apigenin</b> (269)-pentoside        | 5.48  | 447.1552                 | 401.144 /803.3015/ 269.1039/161.0449 | x | x | x  | x | x  | Putatively characterized                                                        |
| 32 | Flavan-3-ol trimer                                  | 5.63  | 863.1810                 | 577.1349/289.0723                    | x | x | n  | n | n  | Putatively characterized                                                        |
| 33 | Flavan-3-ol trimer                                  | 5.72  | 577.134                  | 1153.261/289.0723                    | x | x | n  | n | n  | Putatively characterized                                                        |
| 34 | Kaempferol trihexoside                              | 5.87  | 771.2018                 | 285.0394                             | x | x | x  | x | x  | Putatively characterized                                                        |
| 35 | Genistein or <b>apigenin</b> -rhamnoside            | 5.98  | 461.166                  | 415.1604/269.1039/161.0449/101.0232  | x | x | x  | x | x  | Putatively characterized                                                        |
| 36 | Quercetin 3-(2G-glucosylrutinoside)                 | 6.14  | 771.2018                 | 625.1386/609.1432/463.0287/301.0354  | x | x | x  | x | n  | (Bonerz, Würth, Dietrich, & Will, 2007)                                         |
| 37 | Naringenin - hexoside (prunin)                      | 7.25  | 433.1118                 | 271.0609/151.0070                    | x | x | x  | x | n  | Putatively characterized                                                        |
| 38 | Quercetin - rutinoside                              | 7.46  | 609.1483                 | 301.0354                             | x | x | x  | x | x  | (Bonerz, Würth, Dietrich, & Will, 2007; Cao, Jiang, Lin, Li, Sun, & Chen, 2015) |
| 39 | Quercetin - glucoside                               | 7.61  | 463.0887                 | 301.0319                             | x | x | x  | x | x  | (Bonerz, Würth, Dietrich, & Will, 2007; Cao, Jiang, Lin, Li, Sun, & Chen, 2015) |
| 40 | Genistein or apigenin derivative                    | 7.8   | 441.1738                 | 269.0435                             | x | x | tr | x | n  | Putatively characterized                                                        |
| 41 | Kaempferol rutinoside                               | 8.58  | 593.1507                 | 285.0394                             | x | x | x  | x | x  | (Bonerz, Würth, Dietrich, & Will, 2007; Cao, Jiang, Lin, Li, Sun, & Chen, 2015) |
| 42 | Isorhamnetin rutinoside (or galactoside-rhamnoside) | 8.67  | 623.1598                 | 315.0512                             | x | x | x  | x | x  | (Toydemir, et al., 2013)                                                        |
| 43 | Kaempferol glucoside                                | 8.77  | 447.0916                 | 285.0394/284.0313                    | x | x | x  | x | x  | (Cao, Jiang, Lin, Li, Sun, & Chen, 2015)                                        |
| 44 | Isorhamnetin rutinoside                             | 8.89  | 623.1598                 | 315.0504/271.0597                    | x | x | x  | x | x  | (Bonerz, Würth, Dietrich, & Will, 2007; Cao, Jiang, Lin, Li, Sun, & Chen, 2015) |
| 45 | Isorhamnetin glucoside                              | 9.15  | 477.1022                 | 315.0504/                            | x | x | x  | n | n  | (Picariello, De Vito, Ferranti, Paolucci, & Volpe, 2016)                        |
| 46 | Eriodictyol or dehydrokaempferol derivative         | 9.22  | 503.1766                 | 287.0558/151.0034                    | x | x | x  | x | x  | Putatively characterized                                                        |
| 47 | Caffeoyl-p-coumaroylquinic acid                     | 10.37 | 499.1242                 | 337.0920/ 191.0553/163.0411          | x | n | n  | n | n  | Putatively characterized                                                        |
| 48 | Quercetin                                           | 11.37 | 301.0354                 | 151.0017                             | x | x | x  | x | x  | (Toydemir, et al., 2013)                                                        |

x-present

tr-traces

n-not detected

ni - not identified

Putatively characterized - compound classes assigned by comparison of the elemental composition to public and commercial databases and/or based on fragmentation, UV absorption and retention time corresponding to compounds described in the literature

- Bonerz, D., Würth, K., Dietrich, H., & Will, F. (2007). Analytical characterization and the impact of ageing on anthocyanin composition and degradation in juices from five sour cherry cultivars. *European Food Research and Technology*, 224(3), 355-364.
- Cao, J., Jiang, Q., Lin, J., Li, X., Sun, C., & Chen, K. (2015). Physicochemical characterisation of four cherry species (*Prunus* spp.) grown in China. *Food Chemistry*, 173, 855-863.
- Nowicka, P., & Wojdyło, A. (2016). Stability of phenolic compounds, antioxidant activity and colour through natural sweeteners addition during storage of sour cherry puree. *Food Chemistry*, 196, 925-934.
- Picariello, G., De Vito, V., Ferranti, P., Paolucci, M., & Volpe, M. G. (2016). Species- and cultivar-dependent traits of *Prunus avium* and *Prunus cerasus* polyphenols. *Journal of Food Composition and Analysis*, 45, 50-57.
- Seeram, N. P., Bourquin, L. D., & Nair, M. G. (2001). Degradation Products of Cyanidin Glycosides from Tart Cherries and Their Bioactivities. *Journal of Agricultural and Food Chemistry*, 49(10), 4924-4929.
- Toydemir, G., Capanoglu, E., Gomez Roldan, M. V., de Vos, R. C. H., Boyacioglu, D., Hall, R. D., & Beekwilder, J. (2013). Industrial processing effects on phenolic compounds in sour cherry (*Prunus cerasus* L.) fruit. *Food Research International*, 53(1), 218-225.
