# Supplementary material for: Phenolic Composition Stability and Antioxidant Activity of Sour Cherry Liqueurs
Source: MDPI journal article supplement (doi:10.3390/molecules23092156), 2018-08-27

**Figure S 1. LC MS/MS chromatogram of phenolic compounds in sour cherry liqueurs in positive (A) and negative mode (B)**

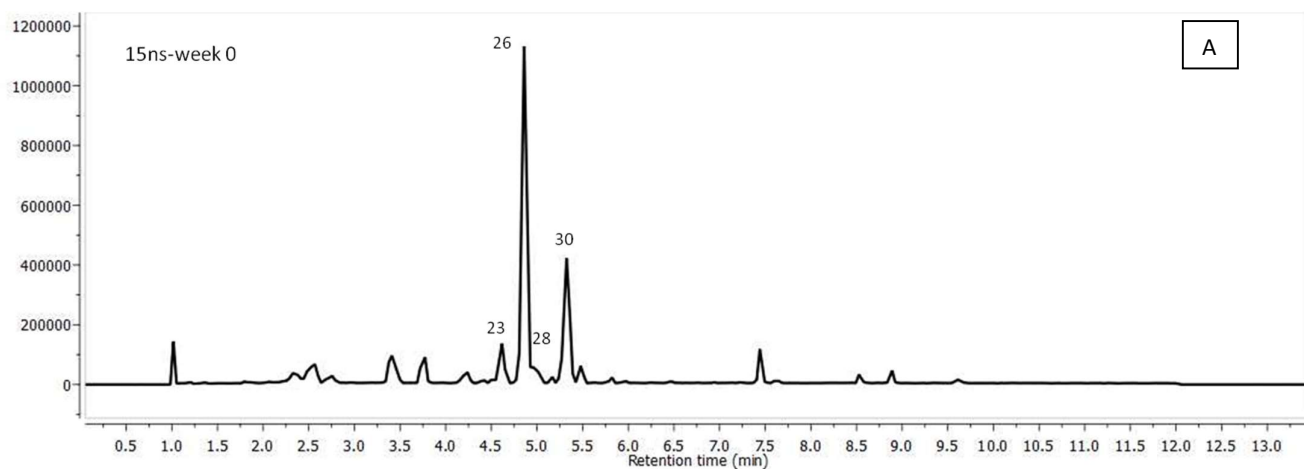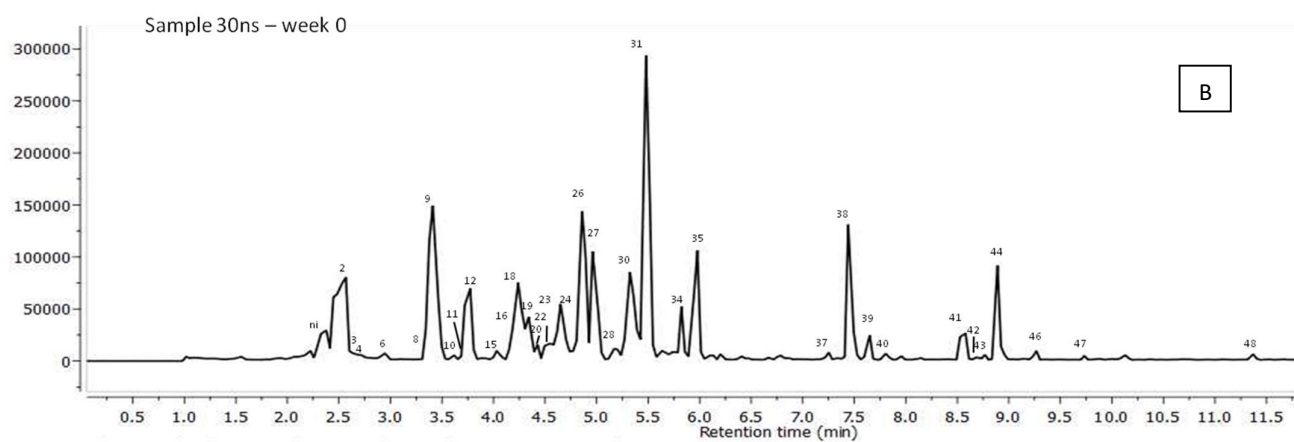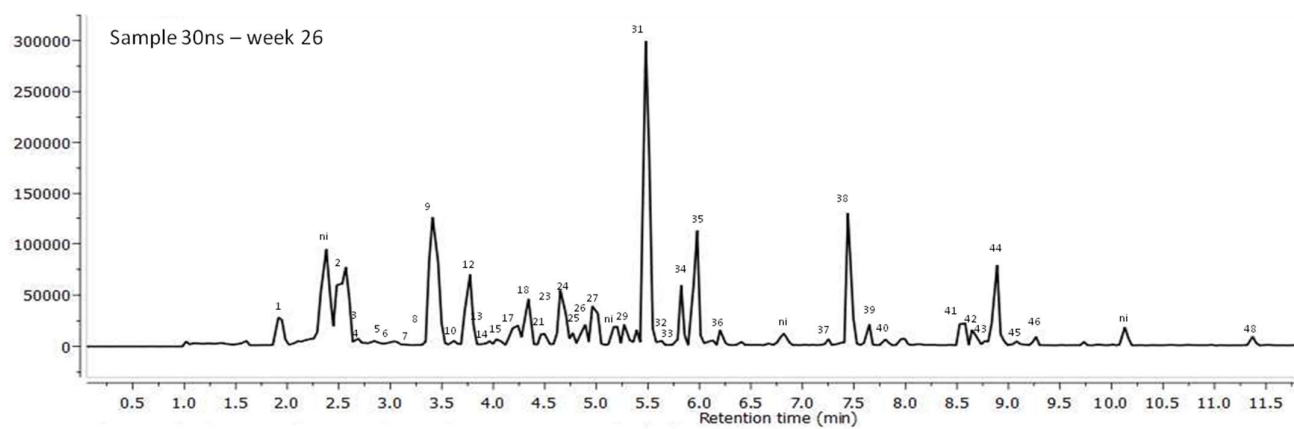

Supplement: s1 [file s1]
